# Supplementary material for: Efficient oxidation of benzyl alcohol into benzaldehyde catalyzed by graphene oxide and reduced graphene oxide supported bimetallic Au–Sn catalysts
Source: Royal Society of Chemistry journal article supplement (doi:10.1039/d3ra03496h), 2023-01-01
Supplement: d3ra03496h1.pdf [file d3ra03496h1.pdf]

## Efficient Oxidation of Benzyl Alcohol into Benzaldehyde Catalyzed by Graphene Oxide and Reduced Graphene Oxide Supported Bimetallic Au–Sn Catalysts

Lili Liu, Xiaojing Zhou, Chunling Xin, Baoli Zhang, Guangman Zhang, Shanshan Li, Li Liu\* and Xishi Tai\*

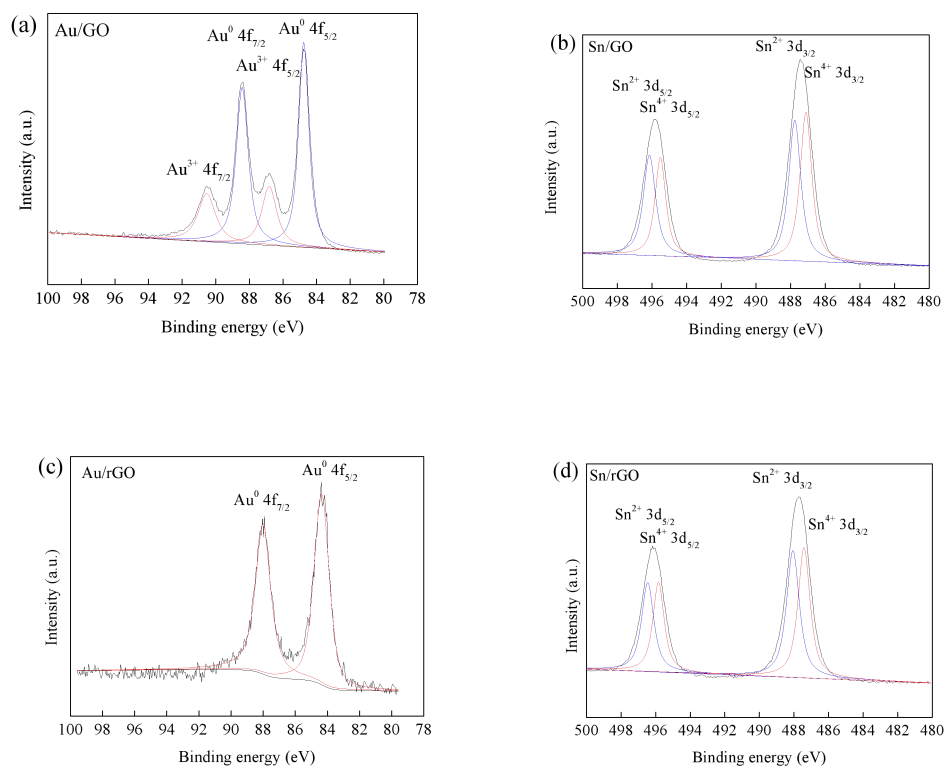

**Fig. S1** Au 4f and Sn 3d XPS of the catalysts Au/GO (a), Sn/GO (b), Au/rGO (c) and Sn/rGO (d).

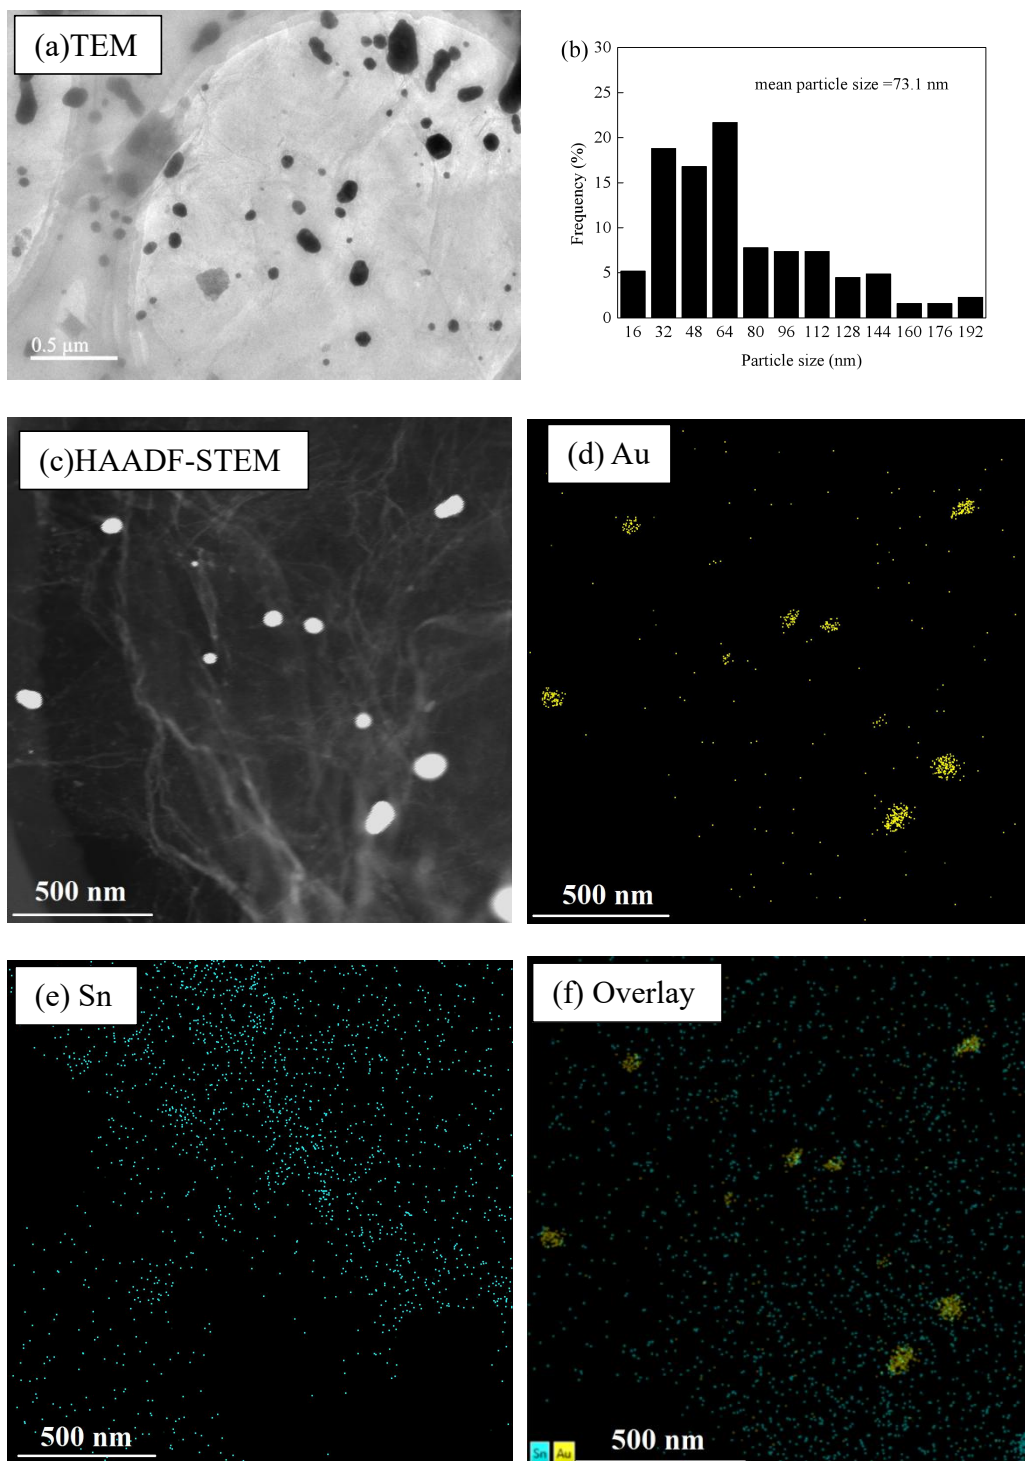

**Fig. S2** (a) TEM micrograph of AuSn/GO-CoIM; (b) Au-Sn size distribution of AuSn/GO-CoIM; (c) HAADF-STEM micrograph; (d, e, f) EDS elemental mapping images micrographs of AuSn/GO-CoIM.

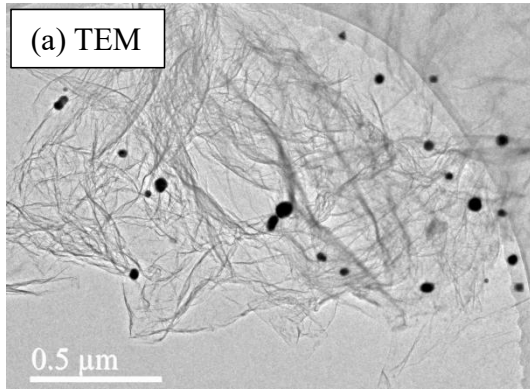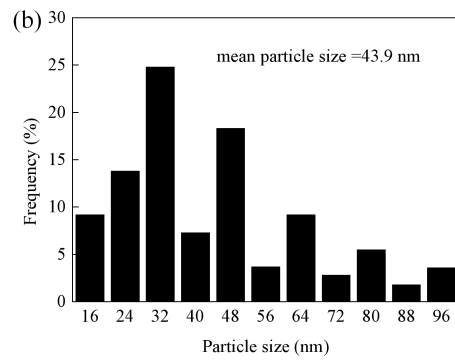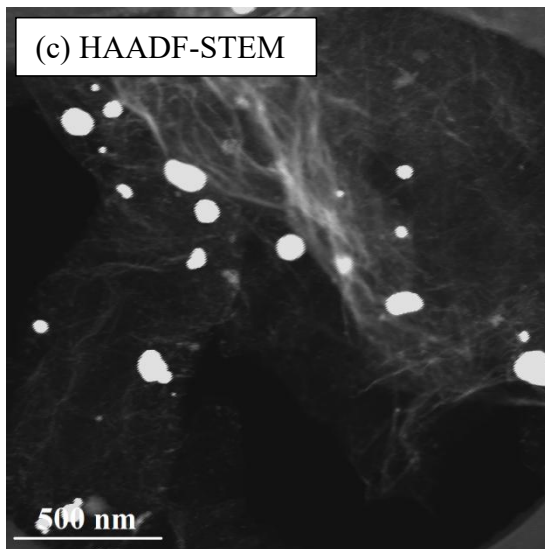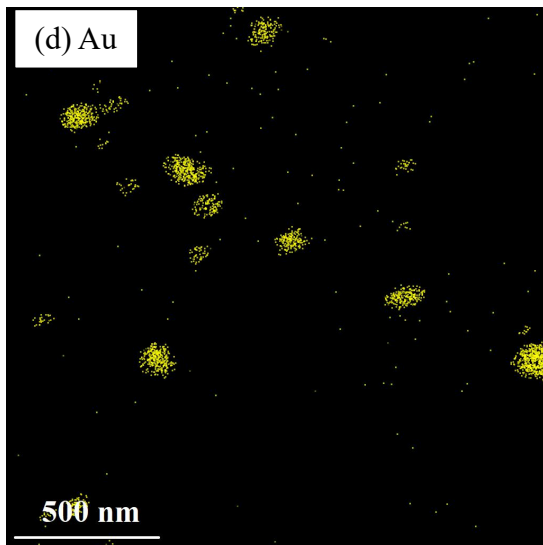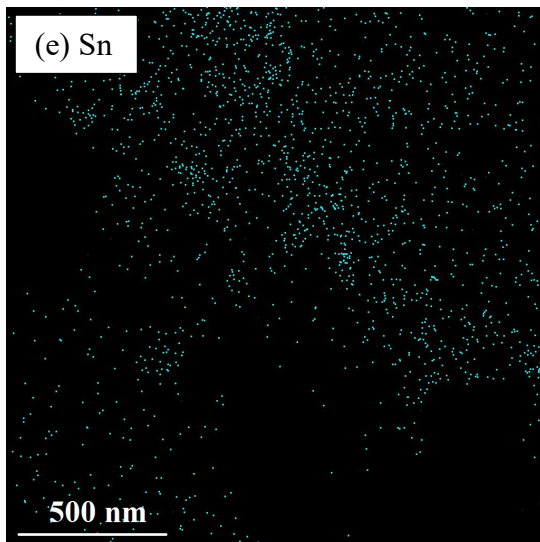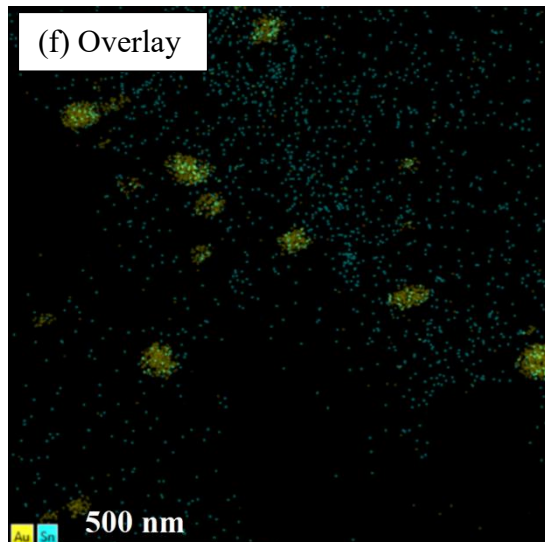

**Fig. S3** (a) TEM micrograph of AuSn/rGO-CoIM; (b) Au-Sn size distribution of AuSn/rGO-CoIM; (c) HAADF-STEM micrograph; (d, e, f) EDS elemental mapping images micrographs of AuSn/rGO-CoIM.

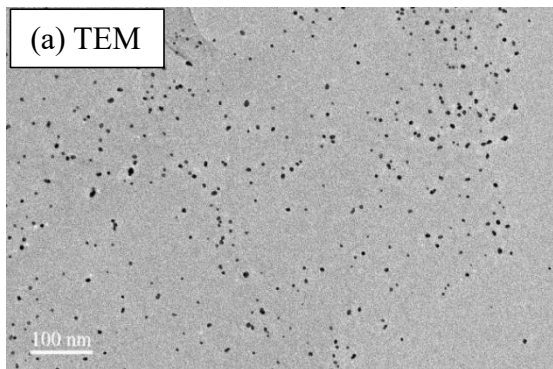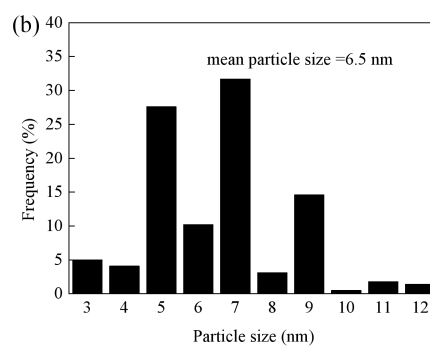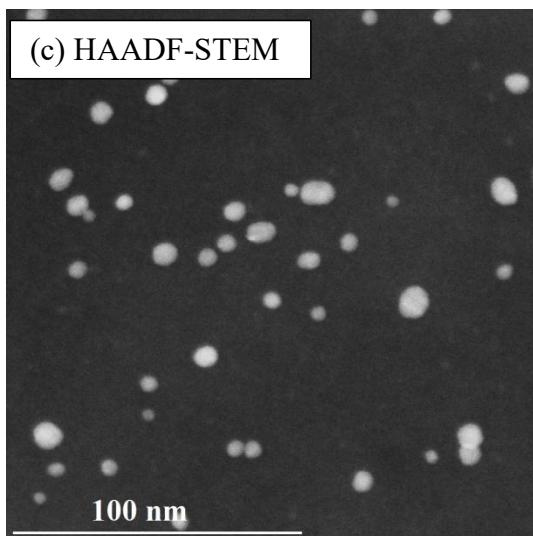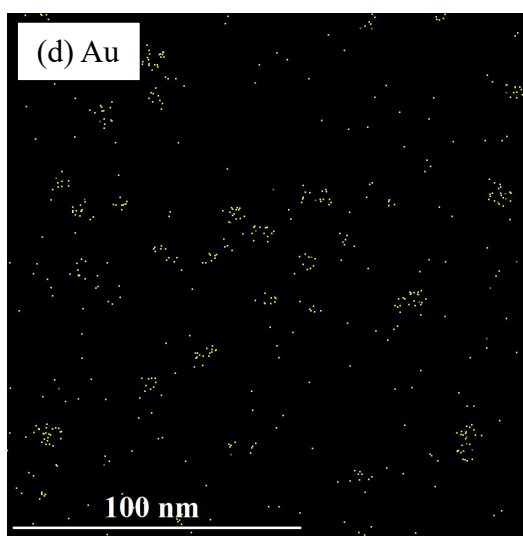

**Fig. S4** (a) TEM micrograph of Au/GO; (b) Au size distribution of Au/GO; (c) HAADF-STEM micrograph; (d, e, f) EDS elemental mapping images micrographs of Au/GO.

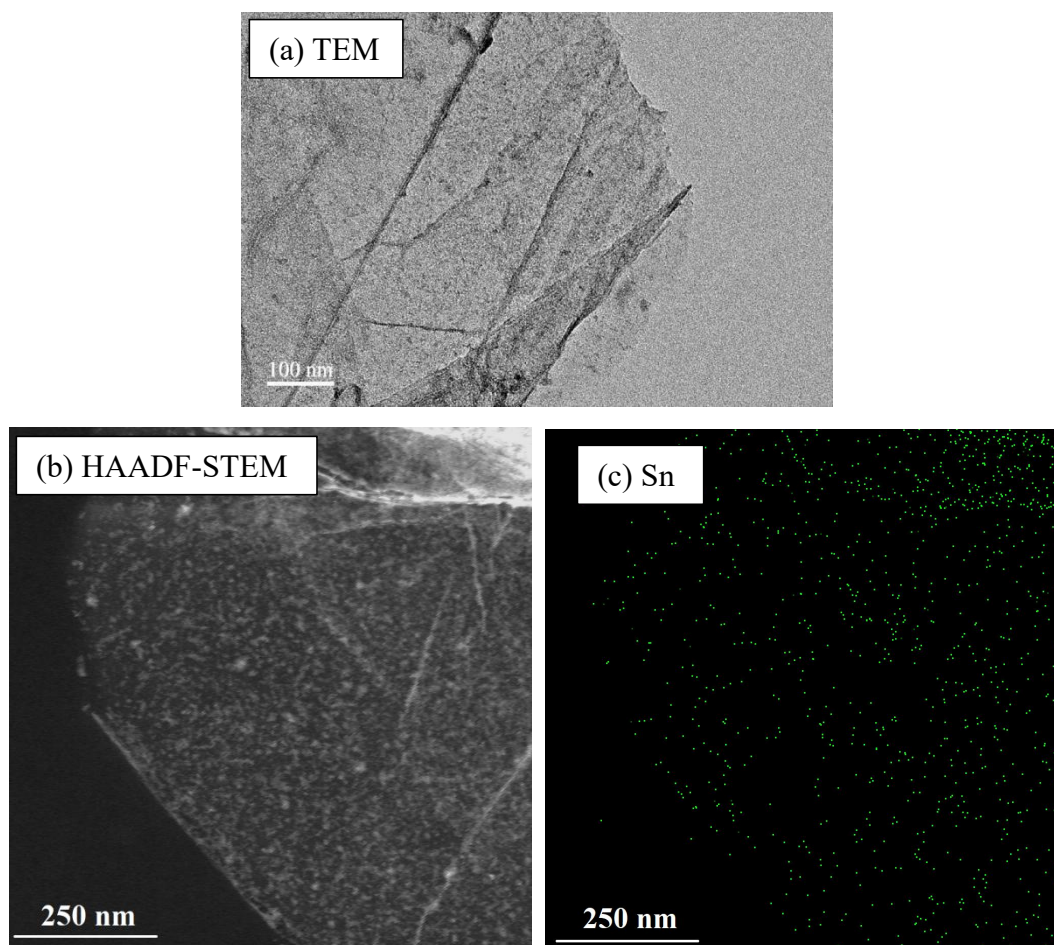

**Fig. S5** (a) TEM micrograph of Sn/GO; (b) Au size distribution of Sn/GO; (c) HAADF-STEM micrograph; (d, e, f) EDS elemental mapping images micrographs of Sn/GO.

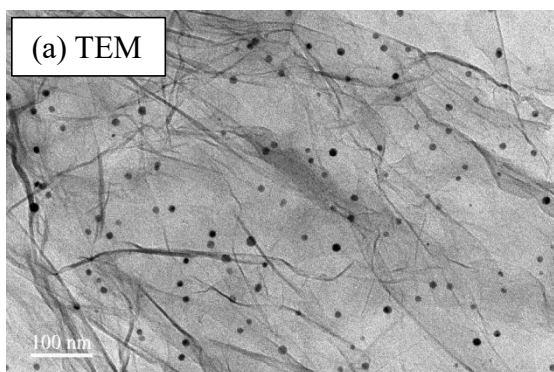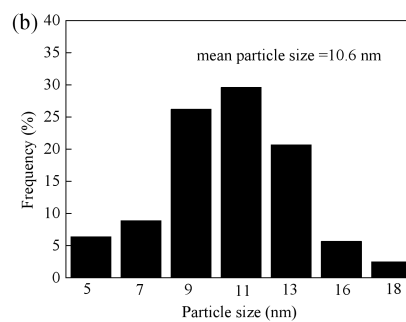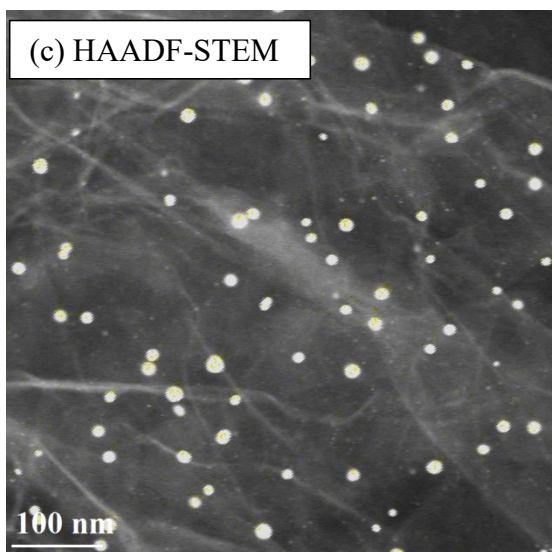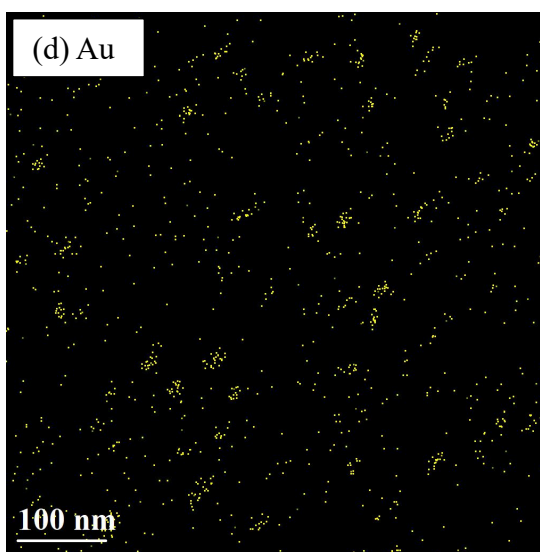

**Fig. S6** (a) TEM micrograph of Au/rGO; (b) Au size distribution of Au/rGO; (c) HAADF-STEM micrograph; (d, e, f) EDS elemental mapping images micrographs of Au/rGO.

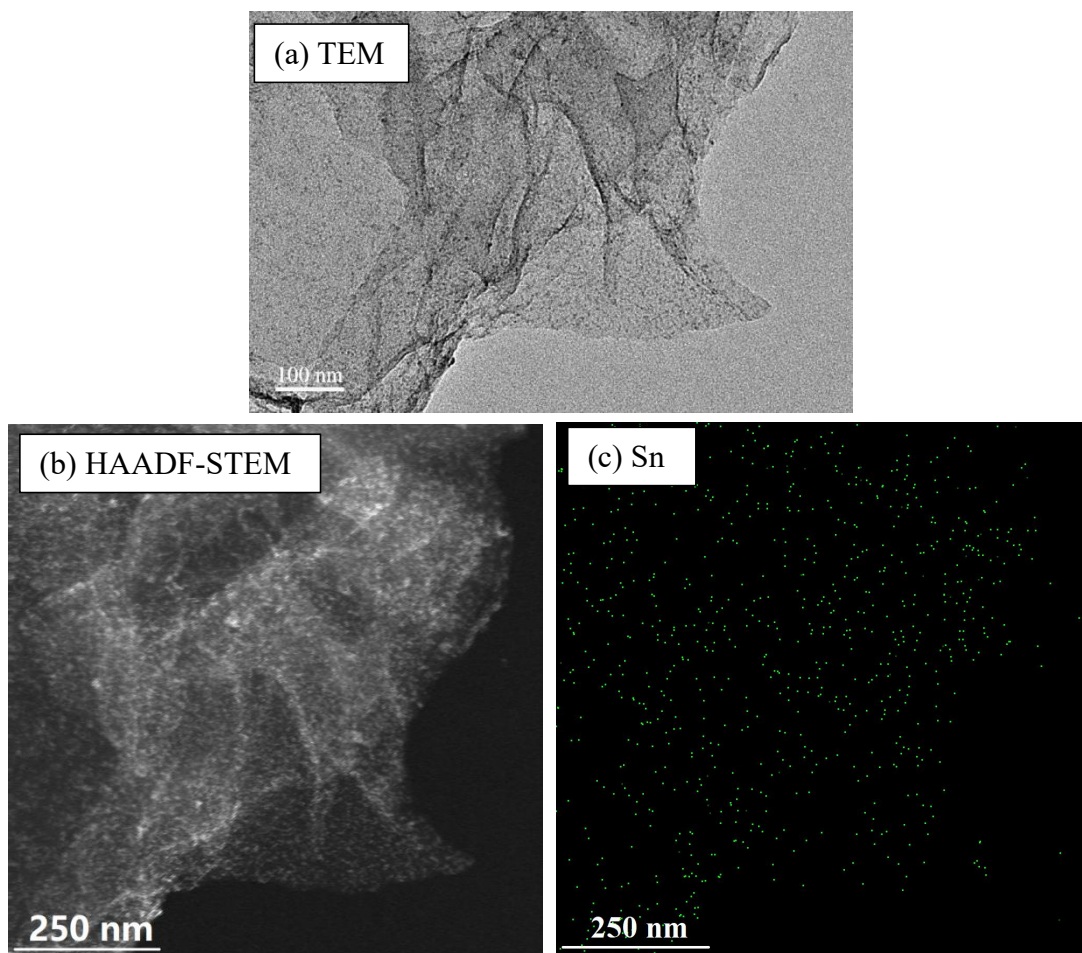

**Fig. S7** (a) TEM micrograph of Sn/rGO; (b) Au size distribution of Sn/rGO; (c) HAADF-STEM micrograph; (d, e, f) EDS elemental mapping images micrographs of Sn/rGO.

**Table S1** The BzOH conversions and BzH selectivities, and BzH yields during the selective oxidation of BzOH on AuSn/GO-CoIM and AuSn/rGO-CoIM catalysts<sup>a</sup>

| Entry | Catalyst      | Solvent      | T (°C) | Pressure (bar) | Time (h) | Conv. (%) | S (%) | Yield (%) | TOF (h <sup>-1</sup> ) |
|-------|---------------|--------------|--------|----------------|----------|-----------|-------|-----------|------------------------|
| 1     | AuSn/GO-CoIM  | THF          | 90     | 5              | 2        | 73.5      | 43.8  | 32.2      | 54.8                   |
| 2     | AuSn/GO-CoIM  | acetonitrile | 90     | 5              | 2        | 17.6      | 27.5  | 4.8       | 13.1                   |
| 3     | AuSn/GO-CoIM  | DMF          | 90     | 5              | 2        | 9.0       | 93.4  | 8.4       | 6.7                    |
| 4     | AuSn/GO-CoIM  | 1,4-dioxane  | 90     | 5              | 2        | 45.8      | 29.8  | 13.6      | 34.2                   |
| 5     | AuSn/GO-CoIM  | THF          | 80     | 5              | 2        | 28.9      | 12.2  | 3.5       | 21.6                   |
| 6     | AuSn/GO-CoIM  | THF          | 100    | 5              | 2        | 90.8      | 18.0  | 16.3      | 67.8                   |
| 7     | AuSn/GO-CoIM  | THF          | 90     | 3              | 2        | 64.8      | 60.5  | 39.2      | 48.4                   |
| 8     | AuSn/GO-CoIM  | THF          | 90     | 8              | 2        | 83.3      | 34.2  | 28.5      | 62.2                   |
| 9     | AuSn/GO-CoIM  | THF          | 90     | 3              | 1        | 30.2      | 60.5  | 18.3      | 45.1                   |
| 10    | AuSn/rGO-CoIM | THF          | 100    | 3              | 2        | 73.3      | 45.7  | 33.5      | 62.5                   |
| 11    | AuSn/rGO-CoIM | acetonitrile | 100    | 3              | 2        | 2.6       | 99.0  | 2.6       | 2.2                    |
| 12    | AuSn/rGO-CoIM | DMF          | 100    | 3              | 2        | 32.9      | 0     | 0         | 28.1                   |
| 13    | AuSn/rGO-CoIM | 1,4-dioxane  | 100    | 3              | 2        | 26.8      | 22.0  | 5.9       | 22.9                   |
| 14    | AuSn/rGO-CoIM | THF          | 80     | 3              | 2        | 14.4      | 6.3   | 0.9       | 12.3                   |
| 15    | AuSn/rGO-CoIM | THF          | 90     | 3              | 2        | 62.0      | 46.3  | 28.7      | 52.9                   |
| 16    | AuSn/rGO-CoIM | THF          | 110    | 3              | 2        | 84.3      | 35.4  | 29.8      | 45.1                   |
| 17    | AuSn/rGO-CoIM | THF          | 100    | 1              | 2        | 50.1      | 29.4  | 13.3      | 42.7                   |
| 18    | AuSn/rGO-CoIM | THF          | 100    | 5              | 2        | 72.9      | 20.8  | 15.1      | 62.2                   |
| 19    | AuSn/rGO-CoIM | THF          | 100    | 3              | 1        | 65.9      | 45.8  | 30.2      | 112.4                  |
| 20    | AuSn/rGO-CoIM | THF          | 100    | 3              | 4        | 85.9      | 25.4  | 21.8      | 36.6                   |

<sup>a</sup> Reaction conditions: BzOH (1.0 mmol), solvent (7.0 mL), catalyst (15.0 mg).



**Table S2** The BzOH conversions, BzH selectivities, and BzH yields during the selective oxidation of BzOH on AuSn/GO-TS and AuSn/rGO-TS nanocatalysts<sup>a</sup>

| Entry | Catalyst | Solvent      | T (°C) | Pressure (bar) | Time (h) | Conv. (%) | S (%) | Yield (%) | TOF (h <sup>-1</sup> ) |
|-------|----------|--------------|--------|----------------|----------|-----------|-------|-----------|------------------------|
| 1     | Au/GO    | THF          | 90     | 3              | 1        | 59.4      | 71.4  | 42.4      | 39.8                   |
| 2     | Au/GO    | Acetonitrile | 90     | 3              | 1        | 2.2       | 99.0  | 2.2       | 1.5                    |
| 3     | Au/GO    | DMF          | 90     | 3              | 1        | 1.0       | 99.0  | 1.0       | 0.7                    |
| 4     | Au/GO    | 1,4-dioxane  | 90     | 3              | 1        | 9.4       | 99.0  | 9.3       | 6.3                    |
| 5     | Au/GO    | THF          | 90     | 3              | 2        | 64.3      | 60.2  | 38.7      | 21.5                   |
| 6     | Au/GO    | THF          | 90     | 3              | 3        | 92.3      | 30.8  | 28.4      | 20.6                   |
| 7     | Au/GO    | THF          | 80     | 3              | 1        | 36.0      | 86.4  | 31.1      | 24.1                   |
| 8     | Au/GO    | THF          | 100    | 3              | 1        | 96.5      | 36.6  | 35.3      | 64.7                   |
| 9     | Au/GO    | THF          | 90     | 1              | 1        | 3.5       | 99.5  | 3.5       | 2.3                    |
| 10    | Au/GO    | THF          | 90     | 5              | 1        | 73.1      | 36.7  | 26.8      | 49.0                   |
| 11    | Sn/GO    | THF          | 90     | 3              | 2        | 1.6       | 99.0  | 1.6       | 0.5                    |
| 12    | Sn/GO    | THF          | 90     | 3              | 3        | 2.3       | 99.0  | 2.3       | 0.5                    |
| 13    | Sn/GO    | THF          | 100    | 3              | 2        | 6.2       | 99.0  | 6.1       | 2.1                    |
| 14    | Sn/GO    | THF          | 100    | 1              | 2        | 4.9       | 99.0  | 4.9       | 1.6                    |
| 15    | Sn/GO    | THF          | 100    | 5              | 2        | 9.5       | 85.5  | 8.1       | 3.2                    |
| 16    | Au/rGO   | THF          | 100    | 3              | 2        | 76.2      | 50.4  | 38.4      | 25.3                   |
| 17    | Au/rGO   | Acetonitrile | 100    | 3              | 2        | 3.1       | 81.5  | 2.5       | 30.5                   |
| 18    | Au/rGO   | DMF          | 100    | 3              | 2        | 38.7      | 0     | 0         | 15.5                   |
| 19    | Au/rGO   | 1,4-dioxane  | 100    | 3              | 2        | 29.7      | 5.7   | 1.7       | 11.9                   |
| 20    | Au/rGO   | THF          | 100    | 3              | 1        | 55.0      | 55.8  | 30.7      | 44.0                   |
| 21    | Au/rGO   | THF          | 100    | 3              | 3        | 98.2      | 33.0  | 32.4      | 26.2                   |
| 22    | Au/rGO   | THF          | 90     | 3              | 2        | 17.3      | 98.4  | 17.0      | 6.9                    |
| 23    | Au/rGO   | THF          | 110    | 3              | 2        | 81.5      | 31.2  | 25.4      | 32.6                   |
| 24    | Au/rGO   | THF          | 100    | 1              | 2        | 5.0       | 98.9  | 4.9       | 2.0                    |
| 25    | Au/rGO   | THF          | 100    | 5              | 2        | 95.4      | 14.0  | 13.4      | 38.2                   |
| 26    | Sn/rGO   | THF          | 100    | 3              | 2        | 16.4      | 100   | 16.4      | 6.1                    |

<sup>a</sup> Reaction conditions: BzOH (1.0 mmol), solvent (7.0 mL), catalyst (15.0 mg).
